# Supplementary material
Source: PubMed Central journal article supplement (PMC4618088)

# Superoxide Dismutase 1 in vivo Ameliorates Maternal Diabetes-Induced Apoptosis and Heart Defects through Restoration of Impaired Wnt Signaling

**Running title:** *Wang et al.; SOD1 blocks diabetes-induced heart defects*

Fang Wang, PhD<sup>1</sup>; Steven A. Fisher, MD<sup>2</sup>; Jianxiang Zhong, PhD<sup>1</sup>; Yanqing Wu, BS<sup>1</sup>;  
Peixin Yang, PhD<sup>1,3</sup>

<sup>1</sup>Department of Obstetrics, Gynecology & Reproductive Sciences, <sup>2</sup>Department of Medicine,

<sup>3</sup>Department of Biochemistry and Molecular Biology, University of Maryland

School of Medicine, Baltimore, MD

## Correspondence:

Peixin Yang, PhD

University of Maryland School of Medicine

Department of Obstetrics, Gynecology & Reproductive Sciences

BRB11-039, 655 W. Baltimore Street

Baltimore, MD 21201

Tel: 410-706-8402

Fax: 410-706-5747

E-mail: [pyang@fpi.umaryland.edu](mailto:pyang@fpi.umaryland.edu)

**Journal Subject Codes:** [189] Type 1 diabetes, [131] Apoptosis, [130] Animal models of human disease

**Abstract:**

**Background** - Oxidative stress is manifested in embryos exposed to maternal diabetes, yet specific mechanisms for diabetes-induced heart defects are not defined. Gene deletion of intermediates of Wnt signaling causes heart defects similar to those observed in embryos from diabetic pregnancies. We tested the hypothesis that diabetes-induced oxidative stress impairs Wnt signaling thereby causing heart defects, and that these defects can be rescued by transgenic overexpression of the reactive oxygen species scavenger SOD1.

**Methods and Results** - Wild-type (WT) and superoxide dismutase 1 (SOD1) overexpressing embryos from nondiabetic WT control dams and nondiabetic/diabetic WT female mice mated with SOD1 transgenic male mice were analyzed. No heart defects were observed in WT and SOD1 embryos under nondiabetic conditions. WT embryos of diabetic dams had a 26% incidence of cardiac outlet defects that were suppressed by SOD1 overexpression. Insulin treatment reduced blood glucose levels and heart defects. Diabetes increased superoxide production, canonical Wnt antagonist expression, caspase activation, and apoptosis, and suppressed cell proliferation. Diabetes suppressed Wnt signaling intermediates and Wnt target gene expression in the embryonic heart, each of which were reversed by SOD1 overexpression. Hydrogen peroxide and peroxynitrite mimicked the inhibitory effect of high glucose on Wnt signaling, which was abolished by the SOD1 mimetic, tempol.

**Conclusions** - The oxidative stress of diabetes impairs Wnt signaling and causes cardiac outlet defects that are rescued by SOD1 overexpression. This suggests that targeting of components of the Wnt5a signaling pathway may be a viable strategy for suppression of CHDs in fetuses of diabetic pregnancies.

**Key word:** heart defects, congenital, heart development, diabetes mellitus, pregnancy, maternal diabetes, oxidative stress, Wnt signaling

Congenital heart defects (CHD) are the most prevalent birth defects occurring in approximately 4-10 per 1000 live births<sup>1</sup>. To date, there are major breakthroughs in understanding the genetic basis of CHD. However, ample epidemiological evidences suggest a significant contribution of environmental factors to the induction of CHD<sup>2-4</sup>. Unfortunately, there is relatively less mechanistic information about the non-genetic factors that adversely affect heart development. Pregestational maternal diabetes is a non-genetic factor that is associated with a five-fold increase in CHD risk<sup>3,4</sup>. The CHD commonly seen in diabetic pregnancies are ventricular septal defects (VSD)<sup>3,5</sup> and outflow tract defects<sup>3,4</sup>. The same types of CHD also are observed in diabetic animal models<sup>6,7</sup>. Studies of animal models have suggested that apoptosis<sup>8-10</sup> and gene dysregulation<sup>6,10,11</sup> are involved in diabetes-induced CHD. However, the mechanism underlying defective heart formation under diabetic conditions is not clearly defined.

Wnt signaling is essential for normal heart development<sup>12</sup>. Targeted gene deletion of key Wnt intermediates results in heart defects similar to those observed in human diabetic pregnancies<sup>13,14</sup>. Altered Wnt signaling has been implicated in diabetes-induced birth defects<sup>15</sup>. However, the role of the Wnt pathway in diabetes-induced heart maldevelopment has not been clarified. Wnt signaling has traditionally been classified into the canonical and the non-canonical pathways<sup>12</sup>. In the canonical pathway, Wnt ligands bind to the membrane-spanning receptor proteins, Frizzleds, and subsequently trigger the phosphorylation of Dishevelled protein (Dvl). Dvl activates a signaling cascade that results in the stabilization and nuclear localization of  $\beta$ -catenin, which interacts with the T cell-specific factor/lymphoid enhancer-binding factor (TCF/LEF) transcription factor to induce the transcription of canonical Wnt signaling target genes. In the absence of Wnt proteins,  $\beta$ -catenin is phosphorylated by glycogen synthase kinase-3beta (GSK3 $\beta$ ) and degraded through the ubiquitin-proteasome pathway. The non-canonical

Wnt ligand, Wnt5a, activates the  $\text{Ca}^{2+}$ /calcineurin signaling pathway, which is critically involved in cardiogenesis<sup>16</sup>. Wnt5a activates calcineurin and its downstream transcriptional effector, the nuclear factor of activated T-cells (NFAT)<sup>16</sup>. In the nucleus, NFAT is associated with transcription factors such as activator protein 1 (AP-1) and myocyte enhancer factor 2 (MEF2) to induce gene transcription<sup>17</sup>. The  $\text{Ca}^{2+}$ /calcineurin/NFAT signaling pathway is essential for outflow track development, normal cardiac valve and septum morphogenesis<sup>16-18</sup>.

Maternal diabetes increases the production of reactive oxygen species and impairs endogenous antioxidant activities leading to oxidative stress during embryonic organogenesis<sup>19, 20</sup>. Antioxidant treatments elicit some beneficial effects against hyperglycemia-induced CHD<sup>9, 21</sup>. In addition, inducing oxidative stress by an inhibitor of the mitochondrial respiratory chain replicates the effect of maternal diabetes on CHD formation<sup>9</sup>. These studies implicate a critical role of oxidative stress in maternal diabetes-induced CHD. To unravel the molecular pathway downstream of oxidative stress leading to CHD in diabetic pregnancies is an essential step towards the development of effective interventions, which directly target identified molecular intermediates downstream of oxidative stress. Our previous studies showed that superoxide dismutase 1 (SOD1) overexpression in SOD1 transgenic (SOD1-Tg) mice abrogates maternal diabetes-induced oxidative stress<sup>22-24</sup>. Using the SOD1-Tg mouse model, we aimed to determine whether oxidative stress is responsible for CHD formation under maternal diabetic conditions and whether maternal diabetes alters Wnt signaling in the developing heart.

## **Methods**

### **Mouse models of diabetic embryopathy**

Mouse models of maternal diabetes-induced embryonic malformations were described previously<sup>25, 26</sup>. The procedures for animal use were approved by the Institutional Animal Care

and Use Committee of University of Maryland School of Medicine.

### **Statistical analyses**

Data on heart defect rates were analyzed by Fisher's Exact test or *Chi* square test. Data on protein and mRNA expression are presented as means  $\pm$  standard errors (SE). The non-parametric Mann Whitney test was performed using the Statistical Package for the Social Sciences (SPSS) Statistics software to estimate significance. Statistical significance was accepted when  $P < 0.05$  in multiple comparisons.

### **Results**

#### **SOD1 overexpression suppresses maternal diabetes-induced oxidative stress in the developing heart**

Staining with DHE of sections in a frontal plane with respect to the heart as shown in Fig. 1A was used to detect superoxide in the embryonic heart. E12.5 hearts from nondiabetic dams showed minimal fluorescent signal whereas embryonic hearts from diabetic mice exhibited robust DHE staining (Figure 1B). Maternal diabetes also significantly increased the abundance of lipid hydroperoxide, an index of lipidperoxidation, in the developing heart (Figure 1C). SOD1 overexpression suppressed maternal diabetes-increased DHE staining (Figure 1B) and lipidperoxidation (Figure 1C).

#### **Suppression of oxidative stress reduces the frequency of maternal diabetes-induced heart defects**

Maternal diabetes significantly induced heart defects. Embryos from diabetic dams did not appear to be growth retarded as determined by somite numbers. Serial cross sections of E17.5 hearts in embryos exposed to diabetes revealed large VSDs in 18% of hearts (Table 1 and Figure 2A). The VSDs in anterior positions (Figure 2A) were in the cardiac outlet and associated with

an over-riding aorta (Figure 2A). More posterior VSDs were large and in the muscular septum. Indian ink injections indentified PTA in four of 50 embryos exposed to diabetes (Table 1, Figure 2B). We next examined the incidence of heart defects in wild-type and SOD1 overexpressing embryos from wild-type dams mated with wild-type or SOD1 transgenic males. Under nondiabetic conditions, SOD1 overexpression did not affect heart development (Table 1). The incidence of heart defects in wild-type embryos (n=50) from diabetic wild-type dams mated with wild-type males was 26% (Table 1). The types of heart defects were VSDs with or without aorta over-riding (Figure 2A) and PTAs (Figure 2B). Likewise, a similar high incidence of heart defects was also present in wild-type embryos from diabetic wild-type dams mated with SOD1-Tg male mice (Table 1, Figure 2B). In contrast, there were no heart defects in SOD1 overexpressing embryos from diabetic wild-type dams mated with SOD1-Tg male mice (Table 1). To reveal whether reduced hyperglycemia by insulin treatment ameliorates diabetes-induced heart defects, insulin pellets remained in diabetic dams throughout the course of the experiments. Insulin treatment effectively reduced blood glucose levels in diabetic dams and significantly reduced the incidence of heart defects (Table 1). These results support our hypothesis that hyperglycemia-induced oxidative stress mediates the teratogenic effect of maternal diabetes on the developing heart.

### **SOD1 overexpression inhibits caspase activation and apoptosis, and restores cell proliferation in the developing heart exposed to diabetes**

Previous studies have reported that maternal diabetes induces apoptosis in cells of the developing heart<sup>8-10</sup>. We sought to determine whether oxidative stress is responsible for diabetes-induced apoptosis. By TUNEL assay, apoptotic cells were present with increased frequency in the endocardial cushions of the OFT and AV canal and the epicardial lining of the ventricles of

E12.5 wild-type embryos from diabetic dams (Figure 3A, B). Under diabetic conditions, SOD1 overexpressing hearts had significantly fewer apoptotic cells compared to wild-type hearts (Figure 3A, B). Maternal diabetes induces apoptosis in a caspase dependent manner in neurulation stage embryos<sup>24,25</sup>. To determine whether maternal diabetes induces caspase activation in the heart, cleaved caspase 3 and caspase 8 were assessed. Maternal diabetes induced caspase 3 and caspase 8 cleavage in wild-type embryos but cleaved caspase products were significantly reduced in SOD1 overexpressing embryos (Figure 3C). We used p-Histone H3 staining to evaluate cell proliferation. Maternal diabetes significantly reduced the number of cells with p-Histone H3 staining and SOD1 overexpression blunted the reduction in the number of p-Histone H3 positive cells (Figure 3D).

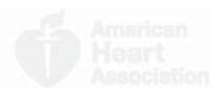

### **SOD1 overexpression blocks the inhibitory effect of maternal diabetes on canonical Wnt signaling in the developing heart**

We analyzed the mRNA expression of five canonical Wnt ligands--Wnt1, Wnt2a, Wnt3a, Wnt7b and Wnt8a--and observed no significant changes in hearts from wild-type embryos or SOD1 overexpressing embryos under both nondiabetic and diabetic conditions (data not shown).

Because SOD1 overexpression under nondiabetic conditions does not affect heart development, cell apoptosis and proliferation, subsequent analyses will not include this group.

Because Wnt expression at the mRNA level is not changed, we turned our attention to factors that may block Wnt protein binding. The availability of Wnt ligands for their receptors is regulated by secreted Wnt antagonists. The mRNA expression of three major Wnt antagonists was assessed. The mRNA expression of the Wnt antagonist, WIF1, was not affected by maternal diabetes (Figure 4A). However, the mRNA expression of the other two Wnt antagonists, sFRP1 and DKK1, was significantly increased in hearts of wild-type embryos from diabetic dams

compared to those in hearts of wild-type embryos of nondiabetic dams and SOD1 overexpressing embryos of diabetic dams (Figure 4A).

To determine whether diabetes-induced increases in sFRP1 and DKK1 expression impact canonical Wnt signaling, we analyzed the phosphorylation status of key canonical Wnt signaling intermediates. Consistent with the increase of Wnt antagonists, maternal diabetes significantly decreased Dvl2 phosphorylation, a positive canonical Wnt signaling transducer, and increased GSK3 $\beta$  activity by reducing the levels of phosphorylated GSK3 $\beta$  (an inactive form of GSK3 $\beta$ ), a negative canonical Wnt signaling regulator (Figure 4B). SOD1 overexpression blunted maternal diabetes-induced Dvl2 dephosphorylation and GSK3 $\beta$  phosphorylation (Figure 4B). All the above upstream Wnt signaling components eventually converge on  $\beta$ -catenin, the central mediator of the canonical Wnt pathway. Total  $\beta$ -catenin protein abundance was decreased by diabetes and SOD1 overexpression blocked this effect (Figure 4B). Under nondiabetic conditions,  $\beta$ -catenin was robustly present in the ventricular myocardium, the endocardial cushion and outflow tract (Figure 4C). Maternal diabetes suppressed  $\beta$ -catenin protein staining in the ventricular myocardium, the endocardial cushion, and the outflow tract area (Figure 4C). These results suggest that maternal diabetes blocked the canonical Wnt signaling in the developing heart. Under diabetic conditions, SOD1 overexpression restored  $\beta$ -catenin expression in the heart (Figure 4C).

### **SOD1 overexpression restores maternal diabetes-impaired non-canonical Wnt signaling in the developing heart**

We next investigated whether the non-canonical Wnt signaling also is affected by maternal diabetes. Abundance of the major non-canonical Wnt ligand, Wnt5a mRNA and protein, was significantly decreased in hearts of wild-type embryos of diabetic dams compared with those in



hearts of wild-type embryos from nondiabetic dams and SOD1 overexpressing embryos from diabetic dams (Figure 5A). Immunofluorescent staining revealed that Wnt5a was predominately localized in the cardiac outflow tract (Figure 5C). Maternal diabetes suppressed and SOD1 overexpression restored Wnt5a expression in the outflow tract area (Figure 5C).

Wnt5a is essential for normal cardiac outflow tract development and deletion of *Wnt5a* gene induces cardiac outflow tract defects<sup>16</sup> similar to those observed in diabetic pregnancies. Wnt5a binds to the receptor tyrosine kinase Ror1/2 leading to activation of the non-canonical Ca<sup>2+</sup>/NFAT pathway<sup>27</sup>. NFAT2 and NFAT4 are two members of the NFAT family that are critical for cardiogenesis<sup>17, 18</sup>. The level of phosphorylated NFAT4 (inactive form) was significantly upregulated by maternal diabetes (Figure 5D). Maternal diabetes-induced NFAT4 phosphorylation was diminished by SOD1 overexpression. NFAT2 protein abundance in nuclear fractions was significantly decreased by maternal diabetes and SOD1 overexpression restored NFAT2 nuclear accumulation (Figure 5E). On the other hand, levels of the phosphorylated (active) CaMKII, a negative regulator of the non-canonical Ca<sup>2+</sup>/NFAT pathway<sup>28</sup>, were significantly increased by maternal diabetes (Figure 5F) and this increase was blunted by SOD1 overexpression (Figure 5F). These results support that oxidative stress is responsible for maternal diabetes-induced impairment of the non-canonical Wnt5a- Ca<sup>2+</sup>/NFAT pathway.

### **SOD1 overexpression restores maternal diabetes-suppressed Wnt target gene expression in the developing heart**

Because maternal diabetes suppresses the canonical Wnt signaling, we tested three target genes of the canonical Wnt signaling, *Islet1*, *GJA1* and *Versican*. The mRNA levels of these three genes were significantly decreased by maternal diabetes (Figure 6A) and restored by SOD1 overexpression (Figure 6A). Similarly, the mRNA levels of three NFAT target genes (*Mrtf-b*,

*Tpm1* and *Rcan1*) were significantly lower in hearts of wild-type embryos exposed to diabetes than those in hearts of wild-type embryos from nondiabetic dams (Figure 6B). SOD1 overexpression restored the expression of *Mrtf-b*, *Tpm1* and *Rcan1* that was suppressed by maternal diabetes (Figure 6B).

### **Both hydrogen peroxide and peroxynitrite mimic the inhibitory effect of high glucose on Wnt signaling**

Next, we sought to determine if ROS or RNS suppression of Wnt signaling directly mediates the teratogenic effect of maternal diabetes on the developing heart by exposing cultured embryos to these agents *in vitro*. Treatment with either 100  $\mu$ M H<sub>2</sub>O<sub>2</sub> or 1  $\mu$ M peroxynitrite mimicked high glucose-suppression of  $\beta$ -catenin and Wnt5a expression, increased DKK1 expression, and inactivated the key non-canonical intermediate, NFAT4, through phosphorylation (Fig. 7B). The ROS scavenger (SOD-mimetic) Tempol (5 mM) restored high glucose-inhibited canonical and non-canonical Wnt signaling (Fig. 7A). Thus SOD1 overexpression *in vivo* and tempol treatment *in vitro* abrogated Wnt signaling inhibition by diabetes or high glucose, supporting ROS inhibition of Wnt signaling playing a causal role in diabetes induced heart defects.

### **SOD1 overexpression is unable to prevent heart defects in Wnt5a null embryos**

Because SOD1 overexpression restored the non-canonical Wnt signaling by both preventing Wnt5 down-regulation and inactivating the negative regulator, CaMKII, it is possible that SOD1 may act downstream of Wnt5a. To test whether SOD1 rescues the non-canonical Wnt signaling by directly inhibiting negative regulators downstream of Wnt5a, *Wnt5a*<sup>+/-</sup> females were crossed with *Wnt5a*<sup>+/-</sup>;SOD1 males to generate *Wnt5a* null embryos with or without SOD1 overexpression (Supplementary Table 1 and Supplementary Figure 1). As previously reported<sup>16</sup>, *Wnt5a* null embryos exhibited heart defects (VSD and PTA) with 100% penetrance similar to

those in embryos of diabetic dams (Supplementary Table 1). SOD1 overexpression did not reduce the incidence of heart defects in Wnt5a null embryos (Supplementary Table 1), suggesting that the heart defects in the Wnt5a knock-out model are not ROS-mediated. These findings support the hypothesis that the beneficial effect of SOD1 is due to its direct effect on Wnt5a by preventing Wnt5a down-regulation.

## Discussion

In the current study, we demonstrate that a mouse model of maternal diabetes induces a spectrum of heart defects similar to that of human diabetic pregnancies<sup>3,5</sup>. In humans, maternal diabetes induces about 5% VSDs and 12% outflow tract defects<sup>3</sup>. These incidences are comparable to the incidences of our STZ-induced diabetic mouse model. The heart defect incidences also are in agreement with those of other animal studies<sup>6,7</sup>. The cause of these heart defects under maternal diabetic conditions is not clear. Although it has been shown that oxidative stress mimics the teratogenicity of maternal diabetes leading to heart defects<sup>9</sup>, no direct evidence support the hypothesis that oxidative stress causes heart defects in diabetic pregnancies. Our study demonstrates the presence of superoxide and lipidperoxidation in the developing heart exposed to diabetes. Furthermore, we provide direct evidence supporting the oxidative stress hypothesis by showing that SOD1 overexpression, which effectively mitigates maternal diabetes-induced oxidative stress in the developing heart, prevents diabetes-induced heart defects. Additionally, our *ex vivo* studies demonstrated that superoxide, hydrogen peroxide and peroxynitrite form a hierarchy of oxidants and are all necessary for the suppression of the Wnt signaling. The SOD1 mimetic, tempol, effectively prevents high glucose-induced impairment of Wnt signaling. In agreement with our findings, a recent study demonstrated that the antioxidant, N-acetylcysteine, suppresses diabetes-induced heart defects<sup>29</sup>. Our findings advance the oxidative stress hypothesis

by revealing perturbed Wnt signaling as a mediator of oxidative stress-induced heart defects.

Future studies are needed to identify specific cellular superoxide sources mediating impairment of Wnt signaling in the developing heart. NADPH oxidases and mitochondrial dysfunction are potential sources of cellular ROS and subsequent formation of RNS.

Embryonic heart development is an intricate process that requires fine-tuned cell proliferation, apoptosis and differentiation. Excess apoptosis and reduced cell proliferation have been implicated in CHD formation and myocardial hypoplasia<sup>30-33</sup>. Enhanced apoptosis<sup>8-10</sup> and reduced cell proliferation<sup>34</sup> are observed in embryonic hearts exposed to diabetes. The apoptotic cells are present in the endocardial cushion and the myocardium, which may contribute to VSD induction<sup>30</sup>, and in the outflow tract, which may be responsible for PTA formation. The mechanism underlying maternal diabetes-induced embryonic heart cell apoptosis is elusive. In neurulation stage embryos, caspase 3 and 8 activation are critically involved<sup>24, 25, 35</sup>. Caspase 8 is an initiator caspase whereas caspase 3 is an executive caspase. Both caspase 3 and 8 are activated in the embryonic heart by maternal diabetes and this activation is blocked by SOD1 overexpression. Oxidative stress can induce caspase activation and subsequent apoptosis by either suppressing pro-survival signaling<sup>26</sup>, or activating pro-apoptotic signaling<sup>26</sup> or both. The Wnt pathway triggers pro-survival signaling and promotes cell proliferation by stimulating cell cycle gene expression<sup>35,36</sup>. Maternal diabetes inhibits heart cell proliferation and SOD1 abrogates this inhibition. Although other signaling pathway may also be involved, based on our results, it appears that impaired Wnt signaling mainly mediates the promoting effect of apoptosis and the inhibitory effect of cell proliferation downstream of oxidative stress in diabetes-induced CHD.

Maternal diabetes alters signaling pathways such as the BMP4 pathway<sup>10</sup> that is essential

for normal cardiogenesis. Beyond Wnt inhibition, sFRP1 antagonizes the BMP4 signaling<sup>37</sup>. It is possible that elevated sFRP1 expression is responsible for maternal diabetes-impaired BMP4 signaling. Both the canonical and non-canonical Wnt signaling pathways are crucial for heart development<sup>37</sup>. In the canonical Wnt pathway, Wnts bind to the Frizzled receptors and trigger Dvl2 activation, which results in the inhibition of GSK3 $\beta$  activity and the subsequent stabilization of its target  $\beta$ -catenin, which leads to gene transcription. Gene deletion of key intermediates in the canonical pathways including Dvl2 and  $\beta$ -catenin causes outflow tract defects including pulmonary atresia, PTA and VSD<sup>14, 38</sup>, which are observed in diabetic pregnancies, suggesting a link between impaired canonical Wnt signaling and maternal diabetes-induced heart defects. Maternal diabetes does not affect the expression of traditionally canonical Wnt members but increases the expression of secreted Wnt antagonists DKK1 and sFRP1. The impact of increased Wnt antagonists is translated into decreased Dvl2 phosphorylation, increased GSK3 $\beta$  activation and destabilizing  $\beta$ -catenin. Deletion of  $\beta$ -catenin results in the loss of cardiac neural crest cells<sup>38</sup>. Because it has been demonstrated that maternal diabetes induces the loss of cardiac neural crest cells<sup>9</sup>, we reason that decreased  $\beta$ -catenin may contribute to the loss of these cells leading to outflow tract defects.  $\beta$ -catenin null mutations reduce cell proliferation in the myocardium<sup>38</sup>. Correlated with outflow tract defects and VSDs in diabetic pregnancies,  $\beta$ -catenin is expressed in the outflow tract area and in the myocardium. Therefore, impaired canonical Wnt signaling may contribute to outflow tract defects and VSD formation.

DKK1 and sFRP1 expression is known to be responsive to oxidative stress<sup>39, 40</sup>. Our data support that maternal diabetes increases the expression of DKK1 and sFRP1 through oxidative stress. Because the stress kinases, c-Jun-N-terminal kinases 1/2 (JNK1/2), is responsible for the induction of DKK1 by oxidative stress *in vitro*<sup>39</sup>, maternal diabetes-induced oxidative stress may

stimulate Wnt antagonist expression through JNK1/2, which is activated in embryos exposed to maternal diabetes<sup>26</sup>. Other stress kinase such as the protein kinase C (PKC) pathway is also activated by maternal diabetes and is downstream of oxidative stress<sup>22</sup> and could also play a role in impaired Wnt activation in our mouse model. Epigenetic modifications may be also involved in diabetes-induced sFRP1 and DKK1 expression because studies have suggested that epigenetic mechanisms such as DNA methylation and histone modifications mediate the dysregulated expression of these genes<sup>41, 42</sup>. The mechanism underlying maternal diabetes-induced Wnt antagonist expression warrants further investigation. The major types of VSDs in our diabetic pregnancy models are peri-membranous VSDs, which likely reflect defects in endocardial cushion development. The defective endocardial cushion development is manifested by enhanced ROS production and apoptosis, and diminished  $\beta$ -catenin expression upon exposure to diabetes. Deletion of the central canonical Wnt mediators, Frizzled 2<sup>13</sup> and  $\beta$ -catenin<sup>38, 43</sup>, results in VSDs along with outflow tract defects, implicating that impaired canonical Wnt signaling due to diabetes exposure may be responsible for VSD formation. In these Wnt mutants, both increased apoptosis and decreased cell proliferation likely contribute to the failed closure of the ventricular septum<sup>38</sup>. The affected cell types include the neural crest cells and cardiomyocytes<sup>38</sup>. In our model, impaired canonical Wnt signaling may enhance apoptosis and reduce proliferation in cells of endocardial cushion leading to VSD formation. The impaired Wnt signaling may also translate to decreased gene expression that is essential for ventricular septum closure<sup>44</sup>.

Maternal diabetes-induced oxidative stress suppresses Wnt target gene expression, which is critical for normal cardiogenesis. Deletion of the canonical Wnt target gene, *Versican*, induces exclusively VSDs<sup>45</sup>, whereas null mutations of the noncanonical Wnt target gene, *Mrtf-b*, mainly causes outflow tract defects<sup>46</sup>. These findings support the hypothesis that the canonical Wnt

pathway is essential for the development of both ventricular septum and the outflow tract, whereas the noncanonical Wnt pathway is essentially involved in the development of the outflow tract. Human mutations of the *GJAI* gene, a canonical Wnt target gene, associating with HLHS (hypoplastic left heart syndrome)<sup>47</sup>, provide additional evidence that the canonical Wnt pathway supports cardiac ventricular development. However, depending on cellular context, the canonical and noncanonical Wnt signaling pathways can interact or counteract with each other<sup>48</sup>. Because deletion of negative regulators of the Wnt pathway such as DKK1<sup>49</sup> and GSK-3 $\beta$ <sup>50</sup> also produces heart defects similar to those in null mutations of Wnt positive regulators, a fine-tuned Wnt signal, not less or not too much, is required for the formation of a structurally normal heart.

SOD1 overexpression did not rescue Wnt5a null-induced heart defects, indicating that heart defects that arise with KO of Wnt5a are not due to oxidative stress. In contrast under conditions of high oxidative stress as in diabetes Wnt5a signaling is suppressed and both its signaling and CHDs are rescued by SOD1 overexpression.

In summary, we provide direct in vivo evidence that oxidative stress mediates the teratogenicity of maternal diabetes leading to heart defects modeling those of diabetic human pregnancies. Maternal diabetes-induced oxidative stress suppresses both the canonical and noncanonical Wnt pathway through different mechanisms (Figure 7C). Whereas the canonical Wnt pathway is impeded because of the upregulation of its antagonists, the noncanonical pathway is blocked through the suppression of noncanonical Wnt5a expression. SOD1 restores the non-canonical Wnt signaling by preventing Wnt5a down-regulation. In the absence of Wnt5a, SOD1 is unable to restore the non-canonical Wnt signaling. Our results support the hypothesis that oxidative stress is the cause of impaired Wnt signaling in the developing heart and subsequent CHD formation in diabetic pregnancies.

**Funding Sources:** This study is supported by National Institutes of Health (NIH) grants R01DK083243, R01DK101972, R01DK103024, R01HL65314 and an American Diabetes Association Basic Science Award (1-13-BS-220).

**Conflict of Interest Disclosure:** None.

## References:

1. Go AS, Mozaffarian D, Roger VL, Benjamin EJ, Berry JD, Borden WB, et al. Heart disease and stroke statistics--2013 update: a report from the American Heart Association. *Circulation*. 2013;127:e6-e245.
2. Jenkins KJ, Correa A, Feinstein JA, Botto L, Britt AE, Daniels SR, et al. Noninherited risk factors and congenital cardiovascular defects: current knowledge: a scientific statement from the American Heart Association Council on Cardiovascular Disease in the Young: endorsed by the American Academy of Pediatrics. *Circulation*. 2007;115:2995-3014.
3. Loffredo CA, Wilson PD, Ferencz C. Maternal diabetes: an independent risk factor for major cardiovascular malformations with increased mortality of affected infants. *Teratology*. 2001;64:98-106.
4. Wren C, Birrell G, Hawthorne G. Cardiovascular malformations in infants of diabetic mothers. *Heart*. 2003;89:1217-1220.
5. Sheffield JS, Butler-Koster EL, Casey BM, McIntire DD, Leveno KJ. Maternal diabetes mellitus and infant malformations. *Obstet Gynecol*. 2002;100:925-930.
6. Kumar SD, Dheen ST, Tay SS. Maternal diabetes induces congenital heart defects in mice by altering the expression of genes involved in cardiovascular development. *Cardiovasc Diabetol*. 2007;6:34.
7. Machado AF, Zimmerman EF, Hovland DN, Jr., Weiss R, Collins MD. Diabetic embryopathy in C57BL/6J mice. Altered fetal sex ratio and impact of the splotch allele. *Diabetes*. 2001;50:1193-1199.
8. Molin DG, Roest PA, Nordstrand H, Wisse LJ, Poelmann RE, Eriksson UJ et al. Disturbed morphogenesis of cardiac outflow tract and increased rate of aortic arch anomalies in the offspring of diabetic rats. *Birth Defects Res A Clin Mol Teratol*. 2004;70:927-938.
9. Morgan SC, Relaix F, Sandell LL, Loeken MR. Oxidative stress during diabetic pregnancy disrupts cardiac neural crest migration and causes outflow tract defects. *Birth Defects Res A Clin Mol Teratol*. 2008;82:453-463.



10. Wentzel P, Gareskog M, Eriksson UJ. Decreased cardiac glutathione peroxidase levels and enhanced mandibular apoptosis in malformed embryos of diabetic rats. *Diabetes*. 2008;57:3344-3352.
11. Roest PA, Molin DG, Schalkwijk CG, van Iperen L, Wentzel P, Eriksson UJ et al. Specific local cardiovascular changes of Nepsilon-(carboxymethyl)lysine, vascular endothelial growth factor, and Smad2 in the developing embryos coincide with maternal diabetes-induced congenital heart defects. *Diabetes*. 2009;58:1222-1228.
12. Gessert S, Kuhl M. The multiple phases and faces of wnt signaling during cardiac differentiation and development. *Circ Res*. 2010;107:186-199.
13. Yu H, Ye X, Guo N, Nathans J. Frizzled 2 and frizzled 7 function redundantly in convergent extension and closure of the ventricular septum and palate: evidence for a network of interacting genes. *Development*. 2012;139:4383-4394.
14. Hamblet NS, Lijam N, Ruiz-Lozano P, Wang J, Yang Y, Luo Z, et al. Dishevelled 2 is essential for cardiac outflow tract development, somite segmentation and neural tube closure. *Development*. 2002;129:5827-5838.
15. Pavlinkova G, Salbaum JM, Kappen C. Wnt signaling in caudal dysgenesis and diabetic embryopathy. *Birth Defects Res A Clin Mol Teratol*. 2008;82:710-719.
16. Schleiffarth JR, Person AD, Martinsen BJ, Sukovich DJ, Neumann A, Baker CV, et al. Wnt5a is required for cardiac outflow tract septation in mice. *Pediatr Res*. 2007;61:386-391.
17. de la Pompa JL, Timmerman LA, Takimoto H, Yoshida H, Elia AJ, Samper E, et al. Role of the NF-ATc transcription factor in morphogenesis of cardiac valves and septum. *Nature*. 1998;392:182-186.
18. Bushdid PB, Osinska H, Waclaw RR, Molkentin JD, Yutzey KE. NFATc3 and NFATc4 are required for cardiac development and mitochondrial function. *Circ Res*. 2003;92:1305-1313.
19. Sivan E, Lee YC, Wu YK, Reece EA. Free radical scavenging enzymes in fetal dysmorphogenesis among offspring of diabetic rats. *Teratology*. 1997;56:343-349.
20. Yang P, Cao Y, Li H. Hyperglycemia induces inducible nitric oxide synthase gene expression and consequent nitrosative stress via c-Jun N-terminal kinase activation. *Am J Obstet Gynecol*. 2010;203:185 e185-111.
21. Roest PA, van Iperen L, Vis S, Wisse LJ, Poelmann RE, Steegers-Theunissen RP, et al. Exposure of neural crest cells to elevated glucose leads to congenital heart defects, an effect that can be prevented by N-acetylcysteine. *Birth Defects Res A Clin Mol Teratol*. 2007;79:231-235.

22. Li X, Weng H, Reece EA, Yang P. SOD1 overexpression in vivo blocks hyperglycemia-induced specific PKC isoforms: substrate activation and consequent lipid peroxidation in diabetic embryopathy. *Am J Obstet Gynecol.* 2011;205:84 e81-86.
23. Weng H, Li X, Reece EA, Yang P. SOD1 suppresses maternal hyperglycemia-increased iNOS expression and consequent nitrosative stress in diabetic embryopathy. *Am J Obstet Gynecol.* 2012;206:448 e441-447.
24. Li X, Weng H, Xu C, Reece EA, Yang P. Oxidative stress-induced JNK1/2 activation triggers proapoptotic signaling and apoptosis that leads to diabetic embryopathy. *Diabetes.* 2012;61:2084-2092.
25. Li X, Xu C, Yang P. c-Jun NH2-terminal kinase 1/2 and endoplasmic reticulum stress as interdependent and reciprocal causation in diabetic embryopathy. *Diabetes.* 2013;62:599-608.
26. Yang P, Li X, Xu C, Eckert RL, Reece EA, Zielke HR et al. Maternal hyperglycemia activates an ASK1-FoxO3a-caspase 8 pathway that leads to embryonic neural tube defects. *Sci Signal.* 2013;6:ra74.
27. Logan CY, Nusse R. The Wnt signaling pathway in development and disease. *Annu Rev Cell Dev Biol.* 2004;20:781-810.
28. MacDonnell SM, Weisser-Thomas J, Kubo H, Hanscome M, Liu Q, Jaleel N, et al. CaMKII negatively regulates calcineurin-NFAT signaling in cardiac myocytes. *Circ Res.* 2009;105:316-325.
29. Moazzen H, Lu X, Ma NL, Velenosi TJ, Urquhart BL, Wisse LJ, et al. N-Acetylcysteine prevents congenital heart defects induced by pregestational diabetes. *Cardiovasc Diabetol.* 2014;13:46.
30. Fisher SA, Langille BL, Srivastava D. Apoptosis during cardiovascular development. *Circ Res.* 2000;87:856-864.
31. Gittenberger-de Groot AC, Bartelings MM, Deruiter MC, Poelmann RE. Basics of cardiac development for the understanding of congenital heart malformations. *Pediatr Res.* 2005;57:169-176.
32. Sallee D, Qiu Y, Liu J, Watanabe M, Fisher SA. Fas ligand gene transfer to the embryonic heart induces programmed cell death and outflow tract defects. *Dev Biol.* 2004;267:309-319.
33. Sugishita Y, Watanabe M, Fisher SA. Role of myocardial hypoxia in the remodeling of the embryonic avian cardiac outflow tract. *Dev Biol.* 2004;267:294-308.
34. Bohuslavova R, Skvorova L, Sedmera D, Semenza GL, Pavlinkova G. Increased susceptibility of HIF-1alpha heterozygous-null mice to cardiovascular malformations associated with maternal diabetes. *J Mol Cell Cardiol.* 2013;60:129-141.

35. Xu C, Li X, Wang F, Weng H, Yang P. Trehalose prevents neural tube defects by correcting maternal diabetes-suppressed autophagy and neurogenesis. *Am J Physiol Endocrinol Metab.* 2013;305:E667-E678.
36. Masckauchan TN, Agalliu D, Vorontchikhina M, Ahn A, Parmalee NL, Li CM, et al. Wnt5a signaling induces proliferation and survival of endothelial cells in vitro and expression of MMP-1 and Tie-2. *Mol Biol Cell.* 2006;17:5163-5172.
37. Misra K, Matisse MP. A critical role for sFRP proteins in maintaining caudal neural tube closure in mice via inhibition of BMP signaling. *Dev Biol.* 2010;337:74-83.
38. Lin L, Cui L, Zhou W, Dufort D, Zhang X, Cai CL, et al. Beta-catenin directly regulates Islet1 expression in cardiovascular progenitors and is required for multiple aspects of cardiogenesis. *Proc Natl Acad Sci U S A.* 2007;104:9313-9318.
39. Colla S, Zhan F, Xiong W, Wu X, Xu H, Stephens O, et al. The oxidative stress response regulates DKK1 expression through the JNK signaling cascade in multiple myeloma plasma cells. *Blood.* 2007;109:4470-4477.
40. Elzi DJ, Song M, Hakala K, Weintraub ST, Shio Y. Wnt antagonist SFRP1 functions as a secreted mediator of senescence. *Mol Cell Biol.* 2012;32:4388-4399.
41. Dahl E, Wiesmann F, Woenckhaus M, Stoehr R, Wild PJ, Veeck J, et al. Frequent loss of SFRP1 expression in multiple human solid tumours: association with aberrant promoter methylation in renal cell carcinoma. *Oncogene.* 2007;26:5680-5691.
42. Vibhakar R, Foltz G, Yoon JG, Field L, Lee H, Ryu GY, et al. Dickkopf-1 is an epigenetically silenced candidate tumor suppressor gene in medulloblastoma. *Neuro Oncol.* 2007;9:135-144.
43. Huh SH, Ornitz DM. Beta-catenin deficiency causes DiGeorge syndrome-like phenotypes through regulation of Tbx1. *Development.* 2010;137:1137-1147.
44. Sakata Y, Kamei CN, Nakagami H, Bronson R, Liao JK, Chin MT. Ventricular septal defect and cardiomyopathy in mice lacking the transcription factor CHF1/Hey2. *Proc Natl Acad Sci U S A.* 2002;99:16197-16202.
45. Hatano S, Kimata K, Hiraiwa N, Kusakabe M, Isogai Z, Adachi E, et al. Versican/Pg-M is essential for ventricular septal formation subsequent to cardiac atrioventricular cushion development. *Glycobiology.* 2012;22:1268-1277.
46. Oh J, Richardson JA, Olson EN. Requirement of myocardin-related transcription factor-B for remodeling of branchial arch arteries and smooth muscle differentiation. *Proc Natl Acad Sci U S A.* 2005;102:15122-15127.

47. Dasgupta C, Martinez AM, Zuppan CW, Shah MM, Bailey LL, Fletcher WH. Identification of connexin43 (alpha1) gap junction gene mutations in patients with hypoplastic left heart syndrome by denaturing gradient gel electrophoresis (DGGE). *Mutat Res.* 2001;479:173-186.
48. Bryja V, Schulte G, Rawal N, Grahn A, Arenas E. Wnt-5a induces Dishevelled phosphorylation and dopaminergic differentiation via a CK1-dependent mechanism. *J Cell Sci.* 2007;120:586-595.
49. Phillips MD, Mukhopadhyay M, Poscablo C, Westphal H. Dkk1 and Dkk2 regulate epicardial specification during mouse heart development. *Int J Cardiol.* 2011;150:186-192.
50. Kerkela R, Kockeritz L, Macaulay K, Zhou J, Doble BW, Beahm C, et al. Deletion of GSK-3beta in mice leads to hypertrophic cardiomyopathy secondary to cardiomyoblast hyperproliferation. *J Clin Invest.* 2008;118:3609-3618.

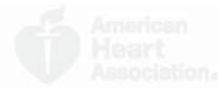

# Circulation

## Cardiovascular Genetics

**Table 1:** Heart Defect Rates in E17.5 embryos of nondiabetic and diabetic dams

| Experimental group | Glucose level(mg/dl) | Embryo Genotype                  | Total embryos | Total heart defect embryos | Embryos with specific heart defects |             |     |   |
|--------------------|----------------------|----------------------------------|---------------|----------------------------|-------------------------------------|-------------|-----|---|
|                    |                      |                                  |               |                            | VSD                                 | VSD with AO | PTA |   |
| ND                 | 140.8±9.3            | WT ♂ x WT ♀<br>(8 litters)       | 48            | 0                          | 0                                   | 0           | 0   |   |
|                    |                      | SOD1-Tg ♂ x WT ♀<br>(14 litters) | WT            | 42                         | 0                                   | 0           | 0   |   |
|                    |                      |                                  | SOD1          | 41                         | 0                                   | 0           | 0   |   |
| DM                 | 433.8±20.6           | WT ♂ x WT ♀<br>(9 litters)       | 50            | 13 (26%)*                  | 6                                   | 3           | 4   |   |
|                    |                      | SOD1-Tg ♂ x WT ♀<br>(14 litters) | WT            | 40                         | 10 (25%)*                           | 5           | 2   | 3 |
|                    |                      |                                  | SOD1          | 45                         | 0                                   | 0           | 0   | 0 |
| DM+Insulin         | 250.9±26.9           | SOD1-Tg ♂ x WT ♀<br>(9 litters)  | WT            | 31                         | 2 (6.0%)†                           | 2           | 0   | 0 |
|                    |                      |                                  | SOD1          | 29                         | 0                                   | 0           | 0   | 0 |

ND: nondiabetic; DM: diabetes Mellitus; DM+Insulin: insulin pellets were maintained throughout the course of experiments. WT: wild-type; Tg: Transgenic; ♂: male and ♀: female (dams); VSD: ventricular septal defects; AO: aorta over-riding; PTA: persistent truncus arteriosus. \* indicate significant difference compared with SOD1 overexpressing embryos and embryos in the ND group. † depict significant difference compared with WT embryos from WT males and WT DM dams.

**Figure Legends:**

**Figure 1:** SOD1 overexpression abrogates maternal diabetes-induced oxidative stress in the developing heart. **A**, E12.5 hearts were sectioned in a frontal plane as shown. **B**, representative images of DHE staining in E12.5 heart sections. DHE reacts with cellular superoxide producing red fluorescence product 2-hydroxyethidium. All cell nuclei were stained with DAPI (Blue). Three hearts from embryos of three different dams (n = 3) per group were used and similar results were obtained. Bars = 150  $\mu$ m. **C**, levels of lipid hydroperoxide (LPO) in E12.5 hearts, expressed as  $\mu$ M per gram of protein. Hearts from embryos of five different dams (n = 5) per group were analyzed. \* indicates significant differences compared to the other three groups. ND: nondiabetic; DM: diabetic mellitus; WT: wild-type hearts; SOD1: SOD1 overexpressing hearts.

**Figure 2:** Maternal diabetes induces outflow tract and ventricular septal defects (VSDs). **A**, H&E stained of E17.5 hearts from anterior to posterior: normal heart (left column) from WT embryos of nondiabetic (ND) dam, heart with an isolated VSD (middle column) representative images of hematoxylin and eosin-stained sections whereas **B** were representative images of india ink dye injections in E17.5 embryonic hearts. **A** represented morphologically normal heart (left column) from WT embryos of nondiabetic (ND) dam, a typical VSD heart (middle column) and aorta-overriding VSD heart (right column) from WT embryos of diabetic (DM) dam; **B**, E17.5 heart and blood vessels imaged in whole mount after injection of India Ink: a normal heart from WT embryos of nondiabetic dam and a heart with PTA from WT embryos of diabetic dam. Scale bars = 300  $\mu$ m. AO: Aorta; PA: Pulmonary Artery; LA: Left Atrium; RA: Right Atrium; LV: left ventricle; RV: right ventricle; VSD: Ventricular septum defect; PTA: Persistent truncus arteriosus.

**Figure 3:** SOD1 overexpression suppresses maternal diabetes-induced cell apoptosis and caspase activation and normalizes cell proliferation in the developing heart. **A** and **B**, representative images of the TUNEL assay showing apoptotic cells (Red signal) and quantified as TUNEL positive cells per section (3 sections from 3 different hearts of each group). Cell nuclei were stained with DAPI (Blue). TUNEL positive cells in the A-V and outflow tract endocardial cushion are shown in **A** and **B**, respectively. In **A**, TUNEL positive cells are also seen in the epicardium lining the ventricle. Bars = 150  $\mu$ m. **C**, representative western blot for detection of cleaved caspase 3, 8 and the quantification normalized to  $\beta$ -actin. Human SOD1 (hSOD1), the transgene product, was detected by a specific human SOD1 antibody. Experiments were repeated three times using hearts from embryos of three different dams (n = 3) per group. **D**, representative images of p-Histone H3 immunostaining, which labels proliferating cells. p-Histone H3 positive cells are labeled by red signal and cell nuclei are stained by DAPI (Blue). In the dot graph, p-Histone H3 positive cells were quantified by the NIH Image J software and expressed as number of cells per section. Three hearts from embryos of three dams (n = 3) per group, and three serial sections per heart were analyzed. Bars = 150  $\mu$ m. IgG: normal rabbit IgG controls; WT: Wild-type; ND: nondiabetic; DM: diabetic mellitus. \* indicates significant difference compared to other groups.

**Figure 4:** SOD1 overexpression rescues diabetes-increased canonical Wnt antagonists and restores the expression of key canonical Wnt intermediates. **A**, mRNA abundance of the three canonical Wnt antagonists. **B**, representative western blots of phosphorylated and non-phosphorylated Dvl2, p-GSK3 $\beta$  and  $\beta$ -catenin. The dot graphs showed the quantification of the immunoblotting. In **A** and **B**, three hearts from embryos of three dams (n = 3) per group were

analyzed. **C**, images of  $\beta$ -catenin immunostaining. Rabbit normal IgG served as controls. Red signal was  $\beta$ -catenin and cell nuclei were stained by DAPI (Blue). Three E12.5 hearts from embryos of three dams ( $n = 3$ ) per group, and three serial sections per heart were analyzed, and similar results were obtained. Bars = 150  $\mu\text{m}$ . \* in **A**, **B** indicate significant difference compared to other groups. ND: nondiabetic; DM: diabetic mellitus; WT: wild-type hearts; SOD1: SOD1 overexpressing hearts.

**Figure 5:** Maternal diabetes impairs the non-canonical Wnt pathway and this impairment is abolished by SOD1 overexpression. **A**, mRNA levels of Wnt5a in E12.5 hearts. **B**, Wnt5a protein levels in E12.5 hearts. **C**, images of Wnt5a immunostaining. Rabbit normal IgG served as controls. Red signal was Wnt5a and cell nuclei were stained by DAPI (Blue). Three hearts from embryos of three dams ( $n = 3$ ) per group, and three serial sections per heart were analyzed, and similar results were obtained. Bars = 150  $\mu\text{m}$ . **D**, levels of p-NFAT4. **E**, levels of nuclear NFAT2. **F**, levels of p-CaMKII. In **B**, **D**, **E**, and **F**, quantification of immunoblotting was shown in the dot graph. In **A**, **B**, **D**, **E**, **F**, experiments were repeated three times using three E12.5 hearts from embryos of three dams ( $n = 3$ ) per group. \* in **A**, **B**, **D**, **E**, **F** indicate significant difference compared to other groups. ND: nondiabetic; DM: diabetic mellitus; WT: wild-type hearts; SOD1: SOD1 overexpressing hearts.

**Figure 6:** SOD1 overexpression rescues maternal diabetes-reduced Wnt target gene expression. **A**, mRNA levels of canonical Wnt target genes. **B**, mRNA levels of noncanonical Wnt target genes. ND: nondiabetic; DM: diabetic mellitus; WT: wild-type hearts; SOD1: SOD1



overexpressing hearts. Five hearts from E12.5 embryos of five dams (n = 5) per group were analyzed. \* indicate significant difference compared to other groups.

**Figure 7:** The SOD1 mimetic, tempol, abolishes high glucose-suppressed Wnt signaling, and both ROS and RNS inhibit Wnt signaling in cultured hearts. **A** and **B**, DKK1,  $\beta$ -catenin, Wnt5a and phosphorylated NFAT4 levels in cultured hearts. Experiments were repeated three times. \* indicate significant difference compared with other groups. . C. Schematic of oxidative stress-mediated Wnt signaling impairment in the developing heart leading to heart defects under maternal diabetic conditions. Oxidative stress induced by maternal diabetes inhibits both the canonical and noncanonical Wnt signaling pathways through two distinct mechanisms. Maternal diabetes suppresses the canonical Wnt signaling by increasing its antagonist expression and the activity of its negative regulator whereas it inhibits the non-canonical Wnt signaling by downregulating Wnt5a. Major types of heart defects associated with gene deletion of key Wnt intermediates are indicated. p means phosphorylation.

**A**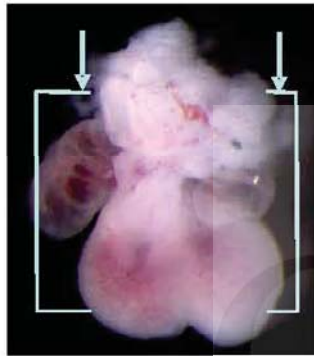**B**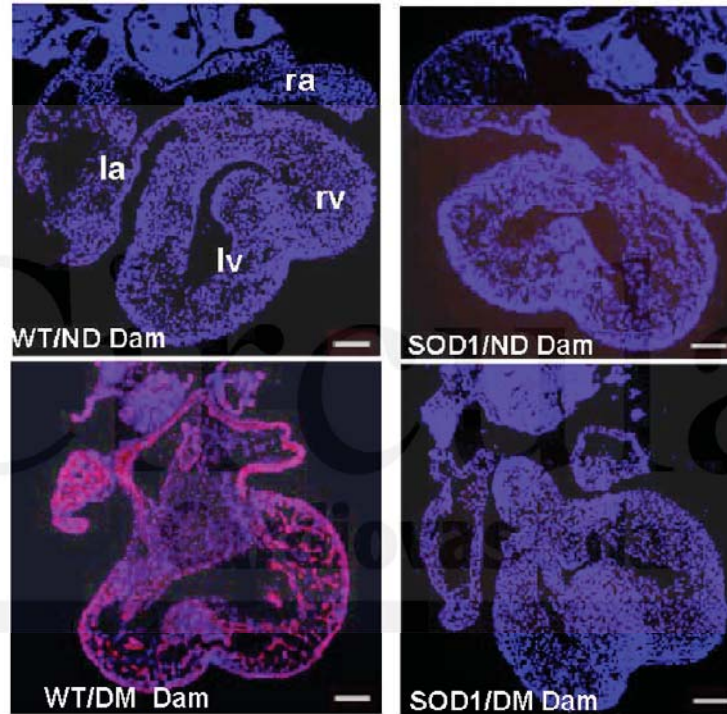**C**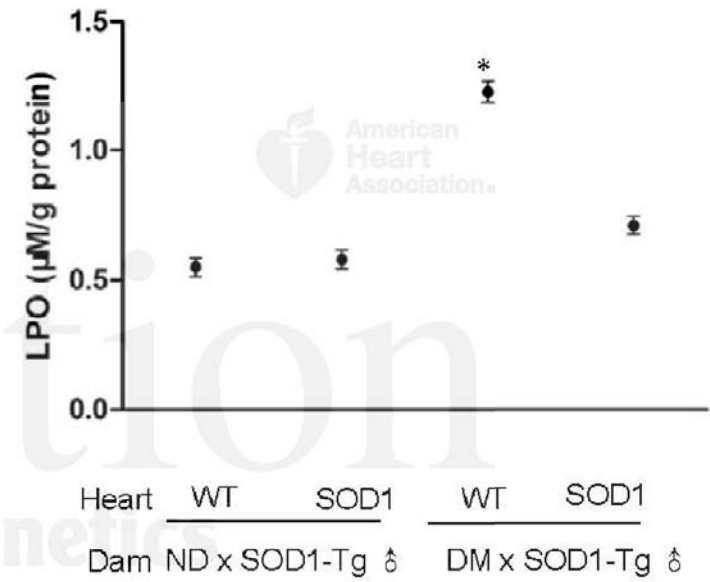

**A** WT embryo/ND Dam    WT embryo/DM Dam

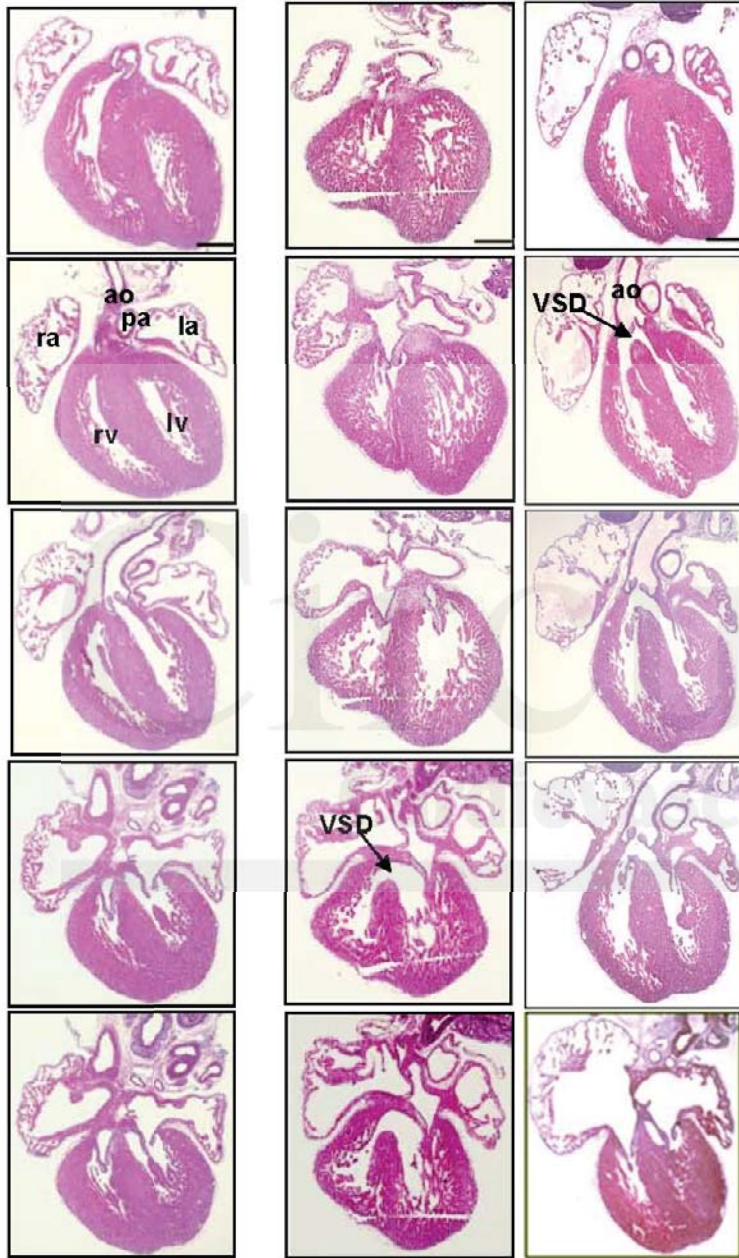

**B**

WT embryo/ND Dam    WT embryo/DM Dam

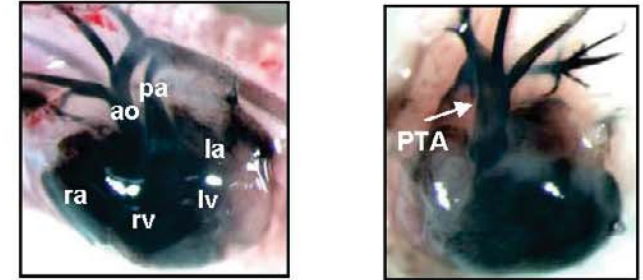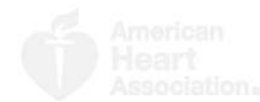

lation  
ular Genetics

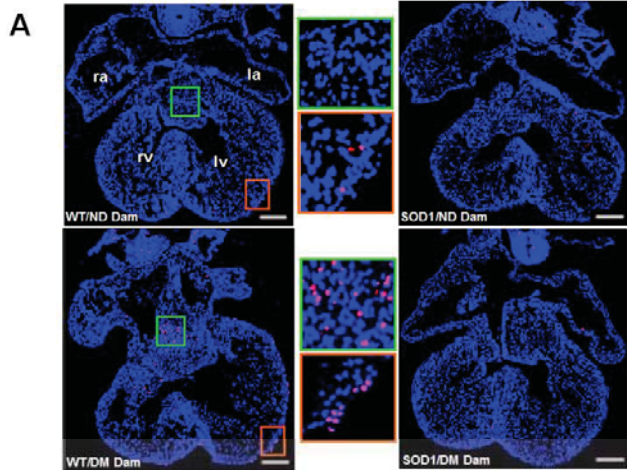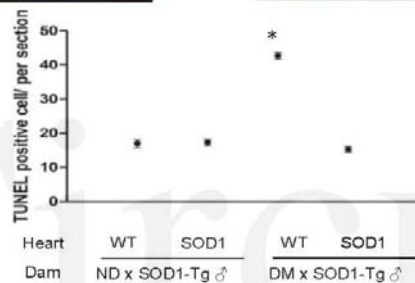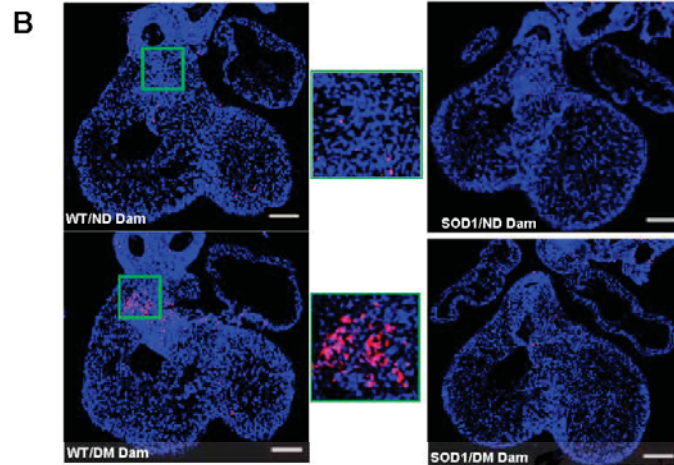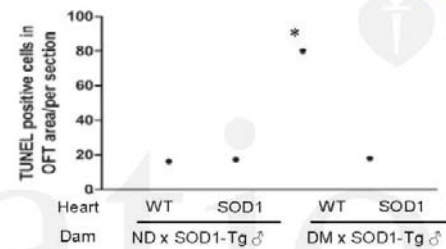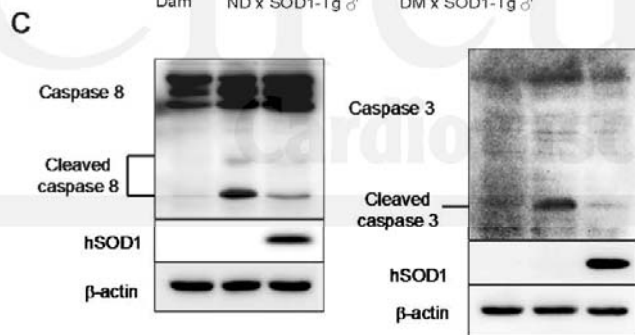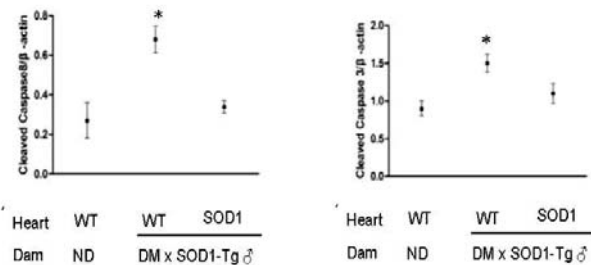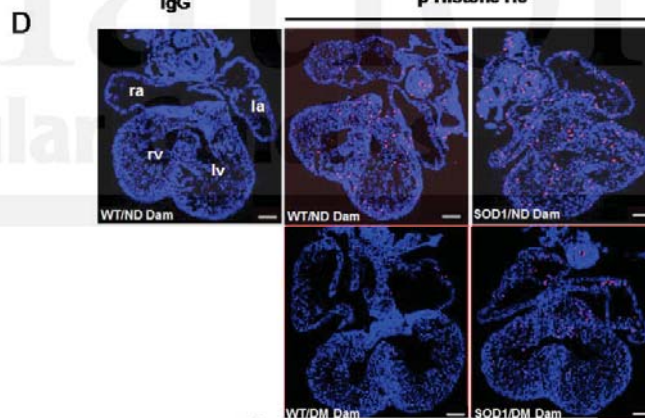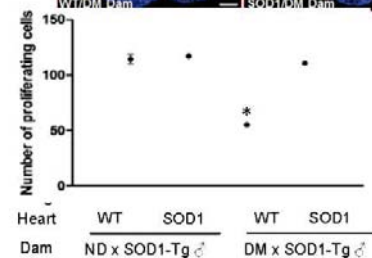

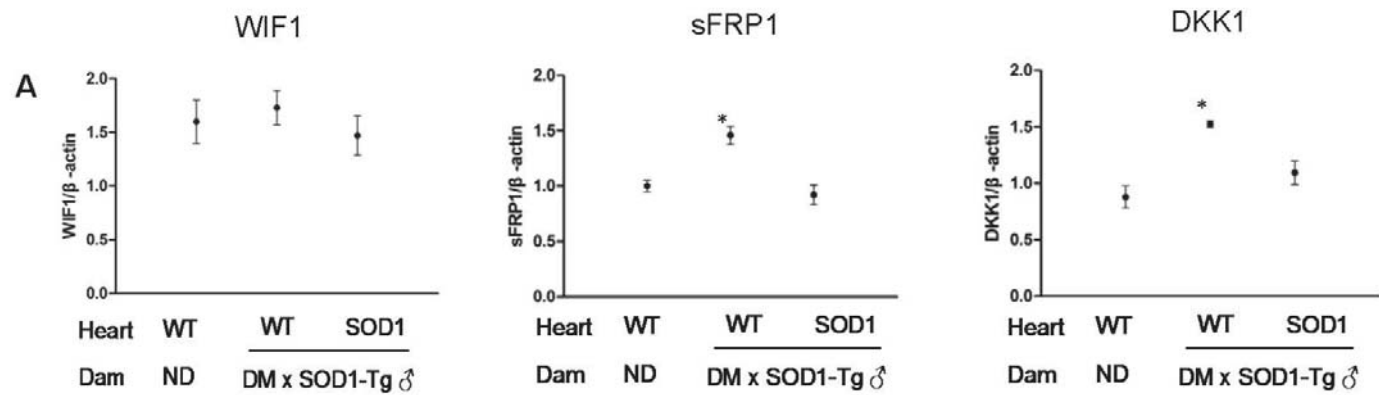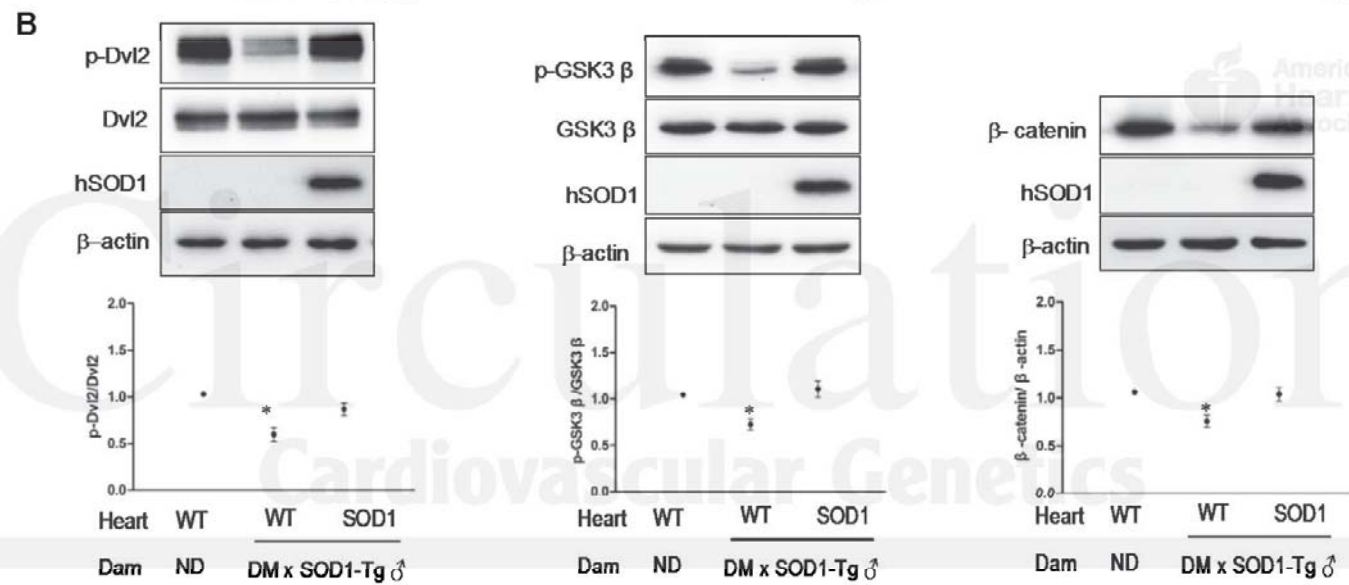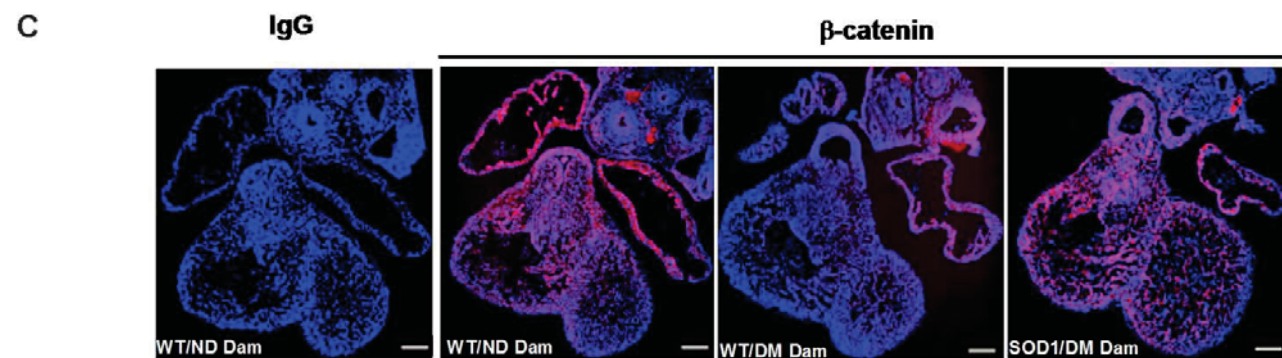

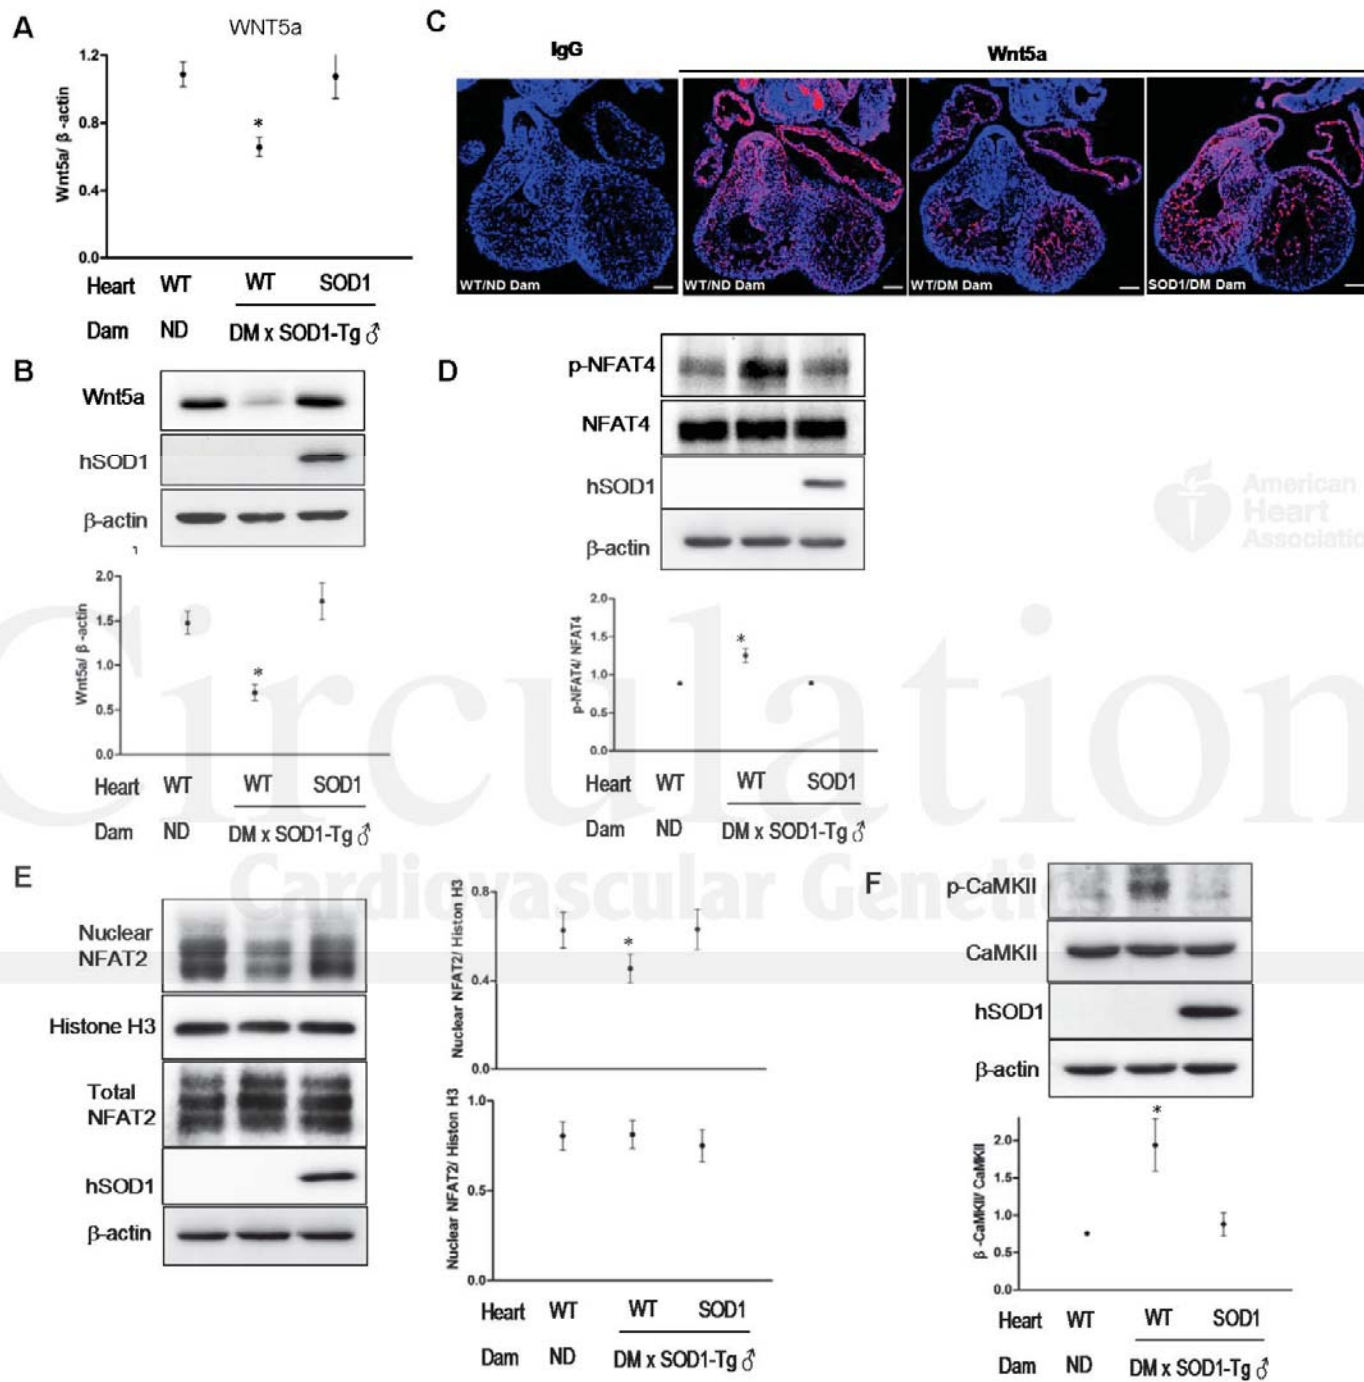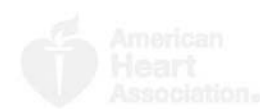

Circulation  
Cardiovascular Genetics

A

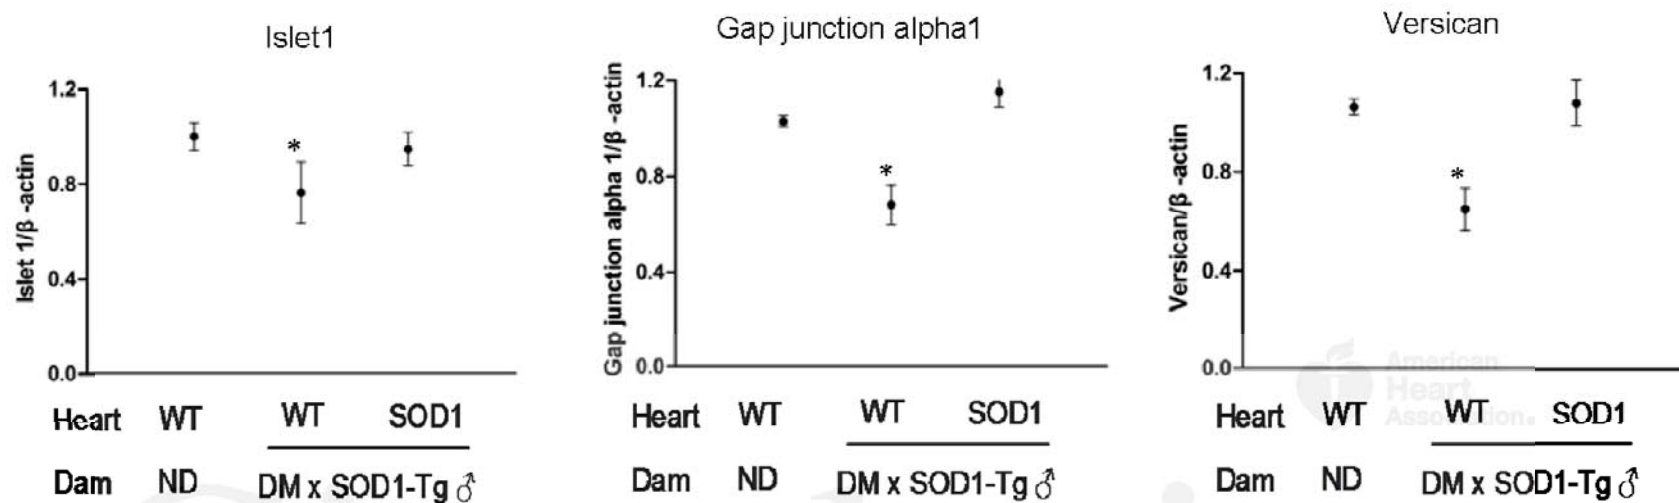

B

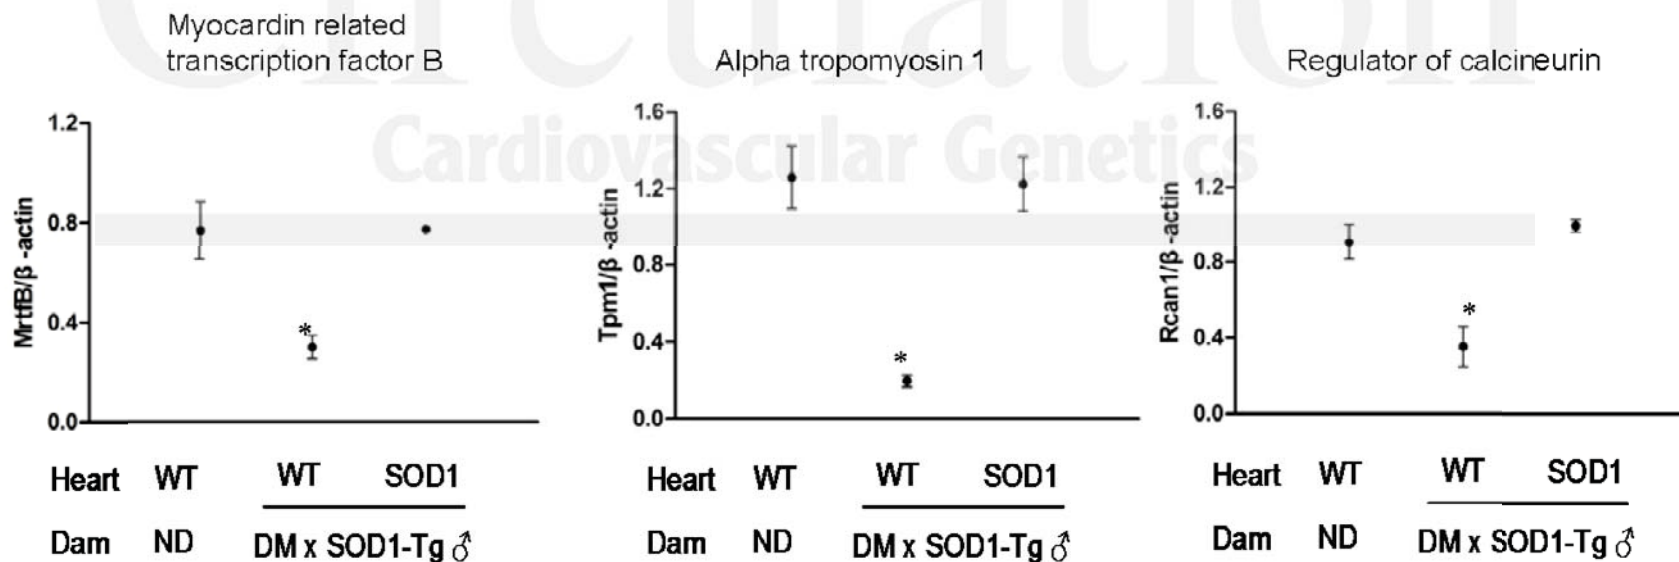

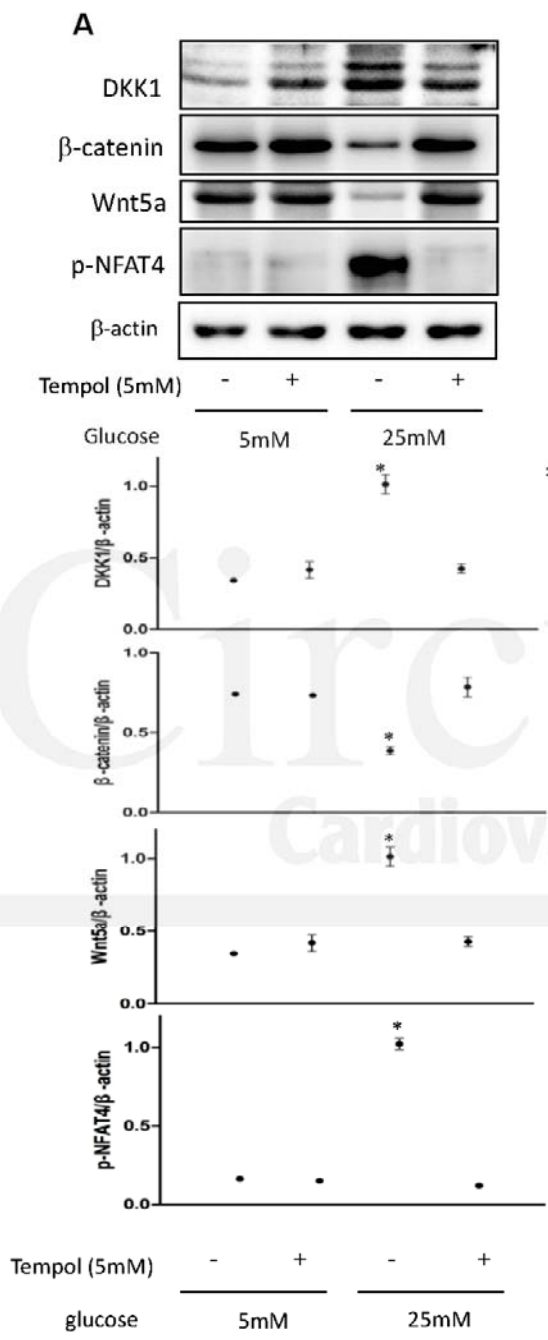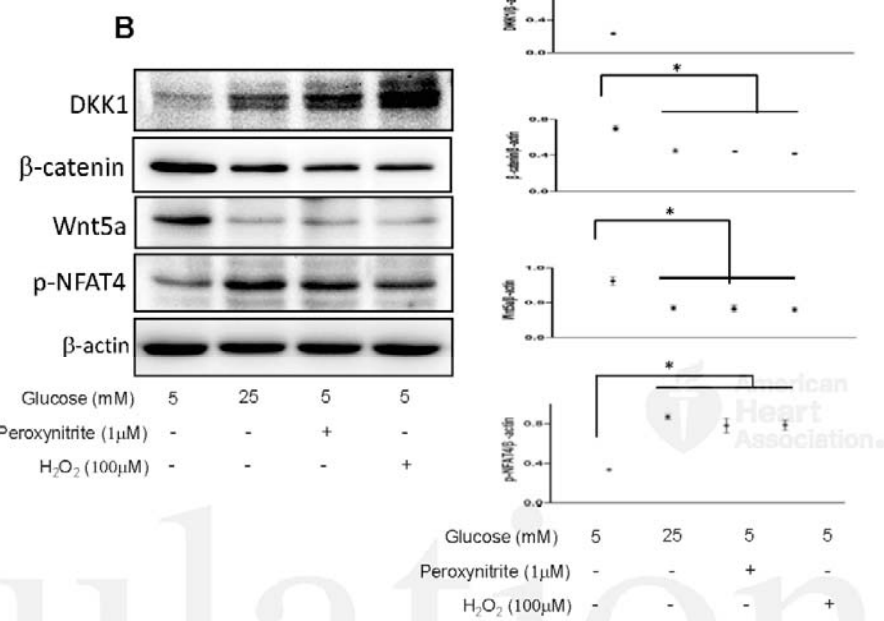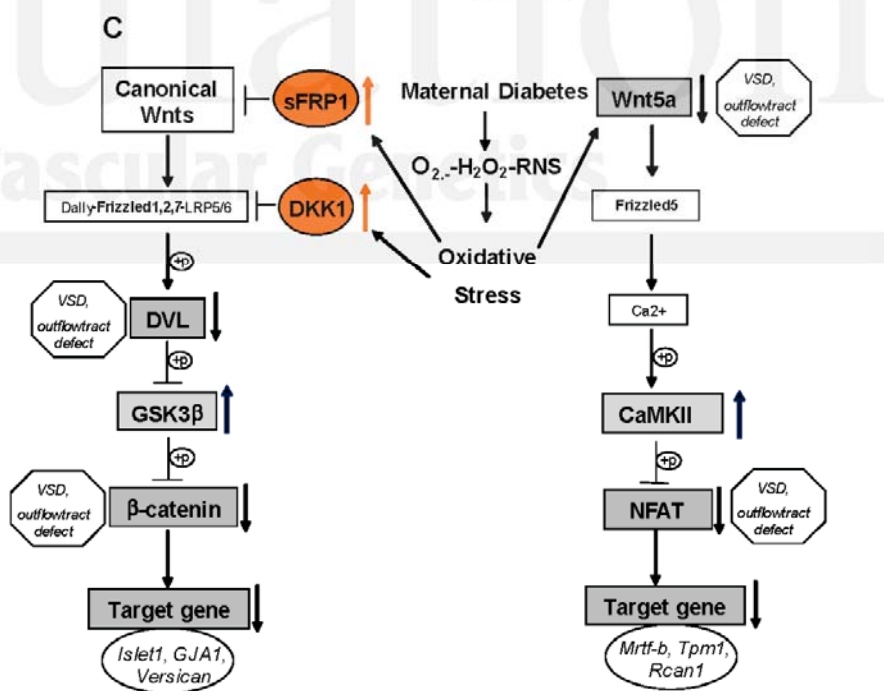

Supplement: NIHMS717421-supplement-001138_-_PAP.pdf [file NIHMS717421-supplement-001138_-_PAP.pdf]
